# Supplementary material for: Validation of nine years of MOPITT V5 NIR using MOZAIC/IAGOS measurements: biases and long-term stability
Source: Copernicus journal article supplement (doi:10.5194/amt-7-3783-2014), 2014-11-18
Supplement: Supplementary file 1 [file amt-7-3783-2014-supplement.pdf]

Supplement of Atmos. Meas. Tech., 7, 3783–3799, 2014  
<http://www.atmos-meas-tech.net/7/3783/2014/>  
doi:10.5194/amt-7-3783-2014-supplement  
© Author(s) 2014. CC Attribution 3.0 License.

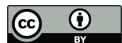

*Supplement of*

## **Validation of nine years of MOPITT V5 NIR using MOZAIC/IAGOS measurements: biases and long-term stability**

**A. T. J. de Laat et al.**

*Correspondence to:* A. T. J. de Laat ([laatdej@knmi.nl](mailto:laatdej@knmi.nl))

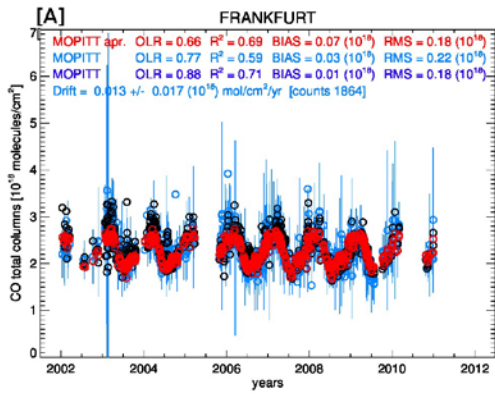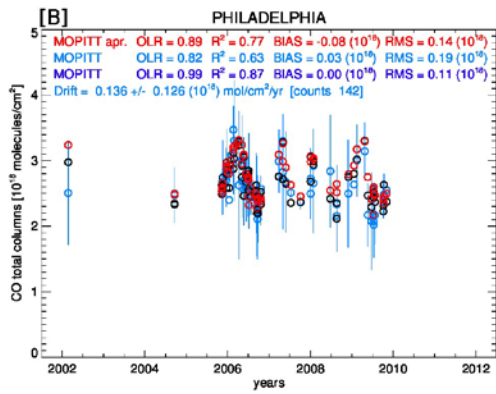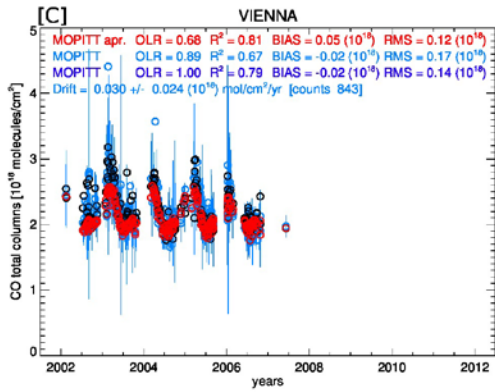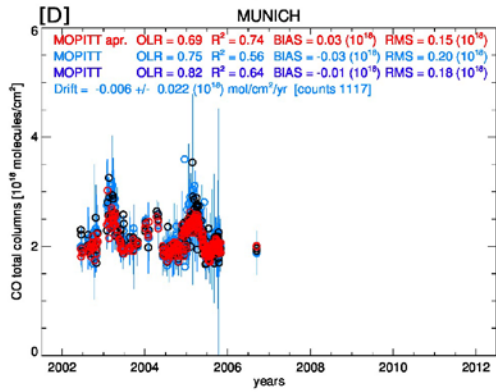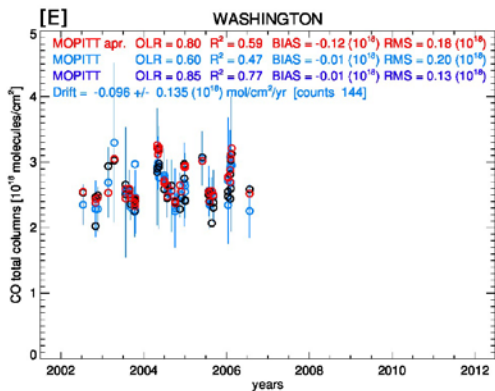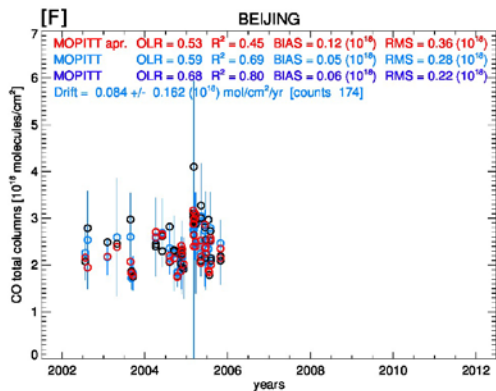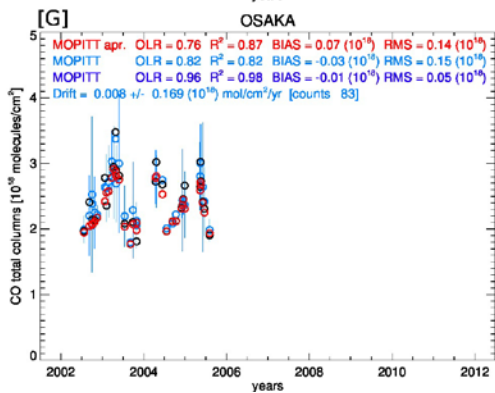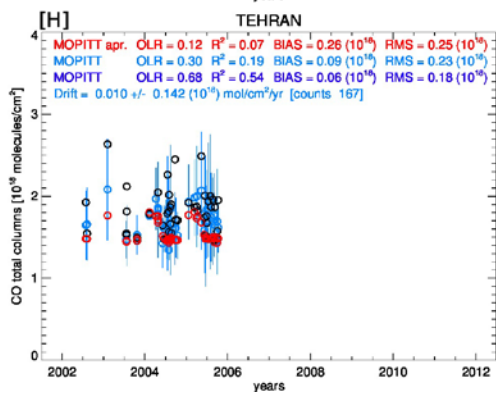

960 **Figure S1A/B/C/D/E/F/G/H**

961 Similar to Figure 3 but for eight different stations

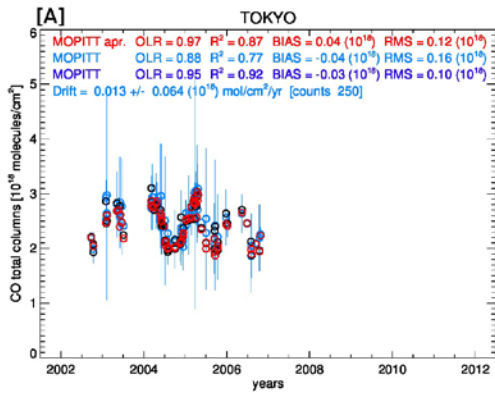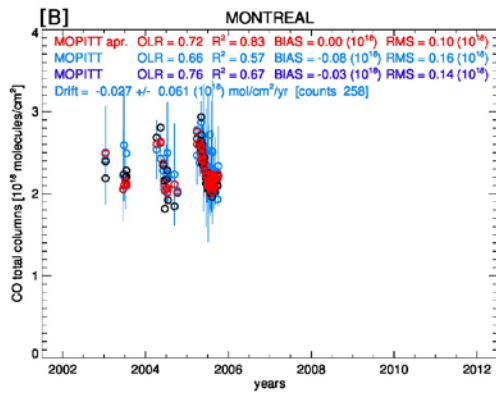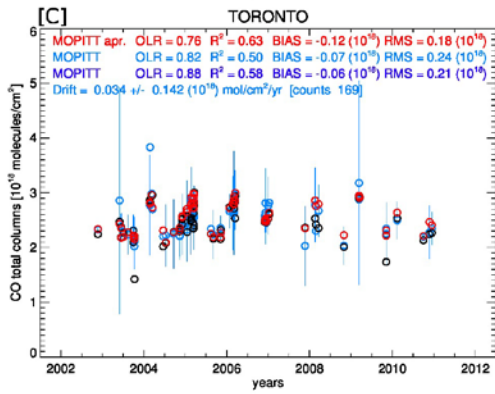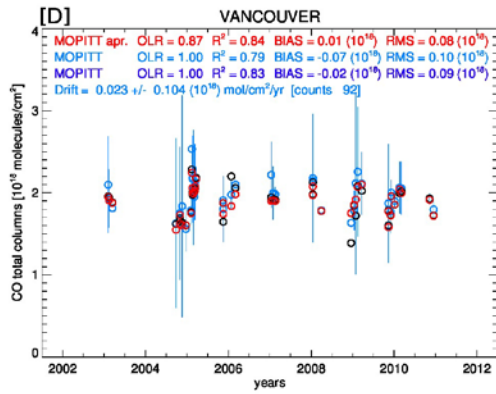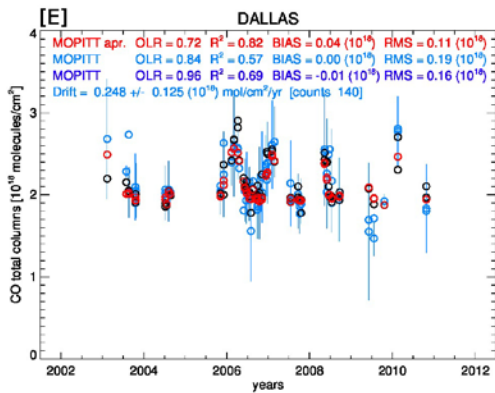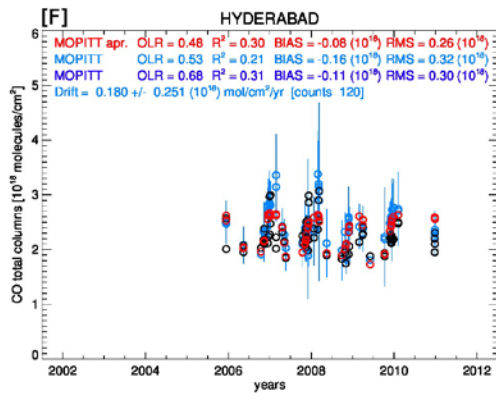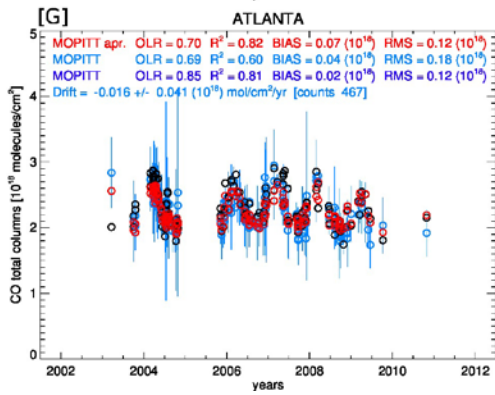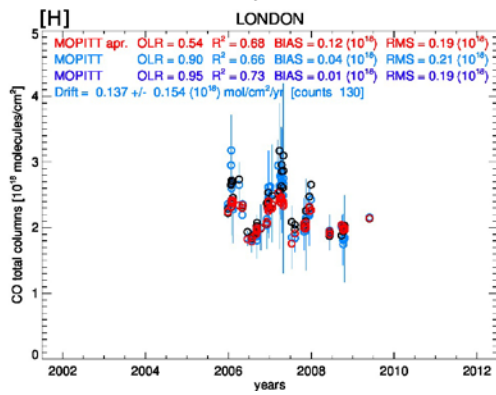

964 **Figure S2A/B/C/D/E/F/G/H**

965 Similar to S1 but for eight different stations

966

967

| Number of MOPITT pixels along a MOZAIC/IAGOS flight path | Total number of MOZAIC-MOPITT comparisons | Percentage of pixels for which MOZAIC/IAGOS falls within MOPITT range |
|----------------------------------------------------------|-------------------------------------------|-----------------------------------------------------------------------|
| 2                                                        | 744                                       | 39.5                                                                  |
| 3                                                        | 549                                       | 61.2                                                                  |
| 4                                                        | 456                                       | 72.8                                                                  |
| 5                                                        | 470                                       | 74.5                                                                  |
| 6                                                        | 401                                       | 76.8                                                                  |
| 7                                                        | 304                                       | 83.6                                                                  |
| 8                                                        | 280                                       | 92.9                                                                  |
| 9                                                        | 264                                       | 84.9                                                                  |
| 10                                                       | 282                                       | 86.9                                                                  |
| 11                                                       | 224                                       | 87.1                                                                  |
| 12                                                       | 252                                       | 90.9                                                                  |
| 13                                                       | 214                                       | 91.1                                                                  |
| 14                                                       | 209                                       | 92.8                                                                  |
| 15                                                       | 195                                       | 95.9                                                                  |
| 16                                                       | 209                                       | 93.8                                                                  |
| 17                                                       | 221                                       | 89.1                                                                  |
| 18                                                       | 137                                       | 91.2                                                                  |
| 19                                                       | 191                                       | 91.1                                                                  |
| 20                                                       | 210                                       | 82.9                                                                  |
| 21                                                       | 169                                       | 94.1                                                                  |
| 22                                                       | 144                                       | 94.4                                                                  |
| 23                                                       | 187                                       | 89.3                                                                  |
| 24                                                       | 131                                       | 89.3                                                                  |
| 25                                                       | 115                                       | 96.5                                                                  |
| 26                                                       | 131                                       | 88.6                                                                  |
| 27                                                       | 129                                       | 93.0                                                                  |
| 28                                                       | 98                                        | 81.6                                                                  |
| 29                                                       | 110                                       | 96.4                                                                  |
| 30                                                       | 121                                       | 99.2                                                                  |
| 31                                                       | 85                                        | 97.6                                                                  |
| 32                                                       | 97                                        | 96.9                                                                  |
| 33                                                       | 98                                        | 96.9                                                                  |
| 34                                                       | 62                                        | 91.9                                                                  |
| 35                                                       | 51                                        | 88.4                                                                  |
| 36                                                       | 62                                        | 98.4                                                                  |
| 37                                                       | 57                                        | 100                                                                   |
| 38                                                       | 19                                        | 100                                                                   |
| 39                                                       | 9                                         | 100                                                                   |
| 40                                                       | 19                                        | 100                                                                   |

970 **Table S1.** Statistics of the number of pixels for which the MOZAIC/IAGOS column falls within  
971 the range of MOPITT columns along the MOZAIC/IAGOS flight path. The first column  
972 indicates the number of MOPITT pixels along the flight path. The second column shows the  
973 number of pixels that qualify according to the selection criterion in the first column. The third  
974 column shows the percentage of pixels qualifying for the selection criterion for which the  
975 MOZAIC/IAGOS column falls within the range of MOPITT column values.

976

977

978

| AIRPORT       | AREA | N    | A     | M     | MR    |
|---------------|------|------|-------|-------|-------|
| FRANKFURT     | EUR  | 1864 | 0.829 | 0.765 | 0.844 |
| MUNICH        | EUR  | 1117 | 0.858 | 0.747 | 0.797 |
| VIENNA        | EUR  | 843  | 0.898 | 0.816 | 0.891 |
| WINDHOEK      |      | 561  | 0.655 | 0.813 | 0.884 |
| ATLANTA       | NAM  | 467  | 0.905 | 0.772 | 0.902 |
| LOS_ANGELES   | NAM  | 281  | 0.780 | 0.687 | 0.784 |
| NEW_DELHI     | ASIA | 268  | 0.514 | 0.646 | 0.793 |
| MONTREAL      | NAM  | 258  | 0.910 | 0.753 | 0.818 |
| TOKYO         | ASIA | 250  | 0.932 | 0.879 | 0.958 |
| PARIS         | EUR  | 207  | 0.865 | 0.833 | 0.876 |
| ABU_DHABI     | ASIA | 201  | 0.719 | 0.544 | 0.619 |
| BEIJING       | ASIA | 174  | 0.670 | 0.828 | 0.894 |
| TORONTO       | NAM  | 169  | 0.796 | 0.707 | 0.761 |
| TEHRAN        | ASIA | 167  | 0.255 | 0.437 | 0.734 |
| WASHINGTON    | NAM  | 144  | 0.766 | 0.682 | 0.878 |
| PHILADELPHIA  | NAM  | 142  | 0.875 | 0.795 | 0.932 |
| DALLAS        | NAM  | 140  | 0.908 | 0.753 | 0.828 |
| NEW_YORK      | NAM  | 139  | 0.786 | 0.731 | 0.847 |
| LONDON        | EUR  | 130  | 0.827 | 0.811 | 0.855 |
| PORTLAND      | NAM  | 128  | 0.883 | 0.850 | 0.942 |
| HYDERABAD     | ASIA | 120  | 0.548 | 0.462 | 0.557 |
| CHICAGO       | NAM  | 99   | 0.815 | 0.693 | 0.776 |
| VANCOUVER     | NAM  | 92   | 0.919 | 0.887 | 0.913 |
| OSAKA         | ASIA | 83   | 0.935 | 0.908 | 0.990 |
| CAIRO         | REST | 80   | 0.829 | 0.793 | 0.956 |
| HONG_KONG     | ASIA | 73   | 0.686 | 0.560 | 0.944 |
| SHANGHAI      | ASIA | 66   | 0.582 | 0.350 | 0.630 |
| BOSTON        | NAM  | 61   | 0.933 | 0.455 | 0.458 |
| DETROIT       | NAM  | 53   | 0.946 | 0.882 | 0.927 |
| RIYADH        | ASIA | 51   | 0.709 | 0.589 | 0.692 |
| KUWAIT_CITY   | ASIA | 46   | 0.738 | 0.803 | 0.887 |
| CHARLOTTE     | NAM  | 44   | 0.695 | 0.159 | 0.360 |
| SAN_FRANCISCO | NAM  | 37   | 0.914 | 0.965 | 0.998 |
| CALGARY       | NAM  | 29   | 0.861 | 0.762 | 0.661 |
| KHARTOUM      | REST | 29   | 0.739 | 0.675 | 0.997 |

979

980 **Table S2A.** Correlation coefficient for airport time series comparison as shown in Figure 4 (see  
981 also figure 3 and supplementary figures S1 and S2). The first column indicates the area to which  
982 the airport belongs, second column (N) indicates the number of collocations, the third column



983 (A) the correlation coefficient for the comparison between MOZAIC/IAGOS and the MOPITT a  
984 priori, the fourth column (M) coefficient for the comparison between MOZAIC/IAGOS and  
985 MOPITT, and the fifth column (MR) is for the comparison between MOZAIC/IAGOS in which  
986 case it is assumed that if the MOZAIC/IAGOS column falls within the range of MOPITT total  
987 column measurements along the MOZAIC/IAGOS flight path, the MOPITT column equals the  
988 MOZAIC/IAGOS column, the so called “range”. The color coding indicates if the correlation  
989 has worsened (pink) or improved (green) compared to the statistic based on the  
990 MOZAIC/IAGOS comparison with the MOPITT a priori (column A).

991

992

| AIRPORT       | AREA |  | N    | A      | M      | MR     |
|---------------|------|--|------|--------|--------|--------|
| FRANKFURT     | EUR  |  | 1864 | 0.065  | 0.034  | 0.013  |
| MUNICH        | EUR  |  | 1117 | 0.026  | -0.031 | -0.014 |
| VIENNA        | EUR  |  | 843  | 0.047  | -0.024 | -0.018 |
| WINDHOEK      |      |  | 561  | -0.035 | -0.022 | -0.019 |
| ATLANTA       | NAM  |  | 467  | 0.071  | 0.042  | 0.023  |
| LOS_ANGELES   | NAM  |  | 281  | -0.020 | -0.055 | -0.031 |
| NEW_DELHI     | ASIA |  | 268  | 0.215  | 0.044  | 0.029  |
| MONTREAL      | NAM  |  | 258  | 0.003  | -0.081 | -0.025 |
| TOKYO         | ASIA |  | 250  | 0.035  | -0.044 | -0.026 |
| PARIS         | EUR  |  | 207  | 0.091  | 0.033  | 0.025  |
| ABU_DHABI     | ASIA |  | 201  | 0.133  | -0.056 | -0.056 |
| BEIJING       | ASIA |  | 174  | 0.116  | 0.050  | 0.063  |
| TORONTO       | NAM  |  | 169  | -0.116 | -0.074 | -0.059 |
| TEHRAN        | ASIA |  | 167  | 0.260  | 0.086  | 0.063  |
| WASHINGTON    | NAM  |  | 144  | -0.121 | -0.009 | -0.014 |
| PHILADELPHIA  | NAM  |  | 142  | -0.079 | 0.028  | -0.003 |
| DALLAS        | NAM  |  | 140  | 0.038  | -0.004 | -0.011 |
| NEW_YORK      | NAM  |  | 139  | -0.044 | 0.064  | 0.053  |
| LONDON        | EUR  |  | 130  | 0.121  | 0.040  | 0.010  |
| PORTLAND      | NAM  |  | 128  | 0.054  | 0.008  | -0.004 |
| HYDERABAD     | ASIA |  | 120  | -0.077 | -0.165 | -0.113 |
| CHICAGO       | NAM  |  | 99   | 0.157  | 0.092  | 0.107  |
| VANCOUVER     | NAM  |  | 92   | 0.007  | -0.075 | -0.023 |
| OSAKA         | ASIA |  | 83   | 0.072  | -0.028 | -0.008 |
| CAIRO         | REST |  | 80   | 0.157  | -0.057 | 0.004  |
| HONG_KONG     | ASIA |  | 73   | 0.385  | 0.058  | 0.043  |
| SHANGHAI      | ASIA |  | 66   | 0.032  | -0.033 | -0.035 |
| BOSTON        | NAM  |  | 61   | 0.019  | 0.036  | 0.064  |
| DETROIT       | NAM  |  | 53   | 0.042  | 0.022  | -0.000 |
| RIYADH        | ASIA |  | 51   | 0.020  | -0.131 | -0.043 |
| KUWAIT_CITY   | ASIA |  | 46   | 0.083  | -0.040 | 0.009  |
| CHARLOTTE     | NAM  |  | 44   | -0.068 | -0.000 | -0.058 |
| SAN_FRANCISCO | NAM  |  | 37   | 0.044  | -0.033 | 0.003  |
| CALGARY       | NAM  |  | 29   | -0.015 | 0.099  | 0.043  |
| KHARTOUM      | REST |  | 29   | 0.074  | -0.035 | 0.003  |

994

995 **Table S2B.** As figure S2A but for the bias between the time series. The color coding indicates if

996 the bias in absolute sense has worsened (pink) or improved (green) compared to the statistic

997 based on the MOZAIC/IAGOS comparison with the MOPITT a priori (column A).

998

| AIRPORT       | N    | A     | M     | MR    |
|---------------|------|-------|-------|-------|
| FRANKFURT     | 1864 | 0.177 | 0.217 | 0.180 |
| MUNICH        | 1117 | 0.147 | 0.204 | 0.184 |
| VIENNA        | 843  | 0.123 | 0.170 | 0.136 |
| WINDHOEK      | 561  | 0.237 | 0.188 | 0.136 |
| ATLANTA       | 467  | 0.124 | 0.179 | 0.120 |
| LOS_ANGELES   | 281  | 0.159 | 0.226 | 0.201 |
| NEW_DELHI     | 268  | 0.351 | 0.309 | 0.247 |
| MONTREAL      | 258  | 0.103 | 0.160 | 0.140 |
| TOKYO         | 250  | 0.125 | 0.162 | 0.095 |
| PARIS         | 207  | 0.160 | 0.169 | 0.147 |
| ABU_DHABI     | 201  | 0.108 | 0.229 | 0.206 |
| BEIJING       | 174  | 0.363 | 0.276 | 0.225 |
| TORONTO       | 169  | 0.177 | 0.237 | 0.214 |
| TEHRAN        | 167  | 0.248 | 0.234 | 0.176 |
| WASHINGTON    | 144  | 0.185 | 0.199 | 0.128 |
| PHILADELPHIA  | 142  | 0.145 | 0.186 | 0.110 |
| DALLAS        | 140  | 0.110 | 0.190 | 0.163 |
| NEW_YORK      | 139  | 0.218 | 0.241 | 0.184 |
| LONDON        | 130  | 0.188 | 0.210 | 0.185 |
| PORTLAND      | 128  | 0.095 | 0.118 | 0.077 |
| HYDERABAD     | 120  | 0.257 | 0.319 | 0.303 |
| CHICAGO       | 99   | 0.251 | 0.289 | 0.254 |
| VANCOUVER     | 92   | 0.080 | 0.104 | 0.090 |
| OSAKA         | 83   | 0.136 | 0.152 | 0.052 |
| CAIRO         | 80   | 0.160 | 0.185 | 0.084 |
| HONG_KONG     | 73   | 0.360 | 0.458 | 0.161 |
| SHANGHAI      | 66   | 0.437 | 0.532 | 0.427 |
| BOSTON        | 61   | 0.074 | 0.276 | 0.248 |
| DETROIT       | 53   | 0.105 | 0.163 | 0.132 |
| RIYADH        | 51   | 0.081 | 0.097 | 0.086 |
| KUWAIT_CITY   | 46   | 0.140 | 0.120 | 0.091 |
| CHARLOTTE     | 44   | 0.199 | 0.395 | 0.352 |
| SAN_FRANCISCO | 37   | 0.185 | 0.150 | 0.025 |
| CALGARY       | 29   | 0.072 | 0.180 | 0.164 |
| KHARTOUM      | 29   | 0.155 | 0.169 | 0.019 |

1000

1001 **Table S2C.** As Figure S2A but for the root-mean-square differences. The color coding indicates

1002 if the root-mean-square difference has worsened (pink) or improved (green) compared to the

1003 statistic based on the MOZAIC/IAGOS comparison with the MOPITT a priori (column A).
